# Supplementary material
Source: publisher figshare collection journal article supplement (https://sage.figshare.com/ndownloader/files/20718246)
Supplement: Supplementary file 1 [file 20718246]

**Supplementary Table 2: Education level of Syrian participants by gender.**

|  | Females | Males | Total |
| --- | --- | --- | --- |
| Graduate degree | 3 | 0 | 3 |
| Undergraduates | 4 | 1 | 5 |
| High school | 4 | 2 | 6 |
| Complementary school | 1 | 2 | 3 |
| Primary school | 6 | 2 | 8 |
| Total | 18 | 7 | 25 |
